# Supplementary material
Source: publisher site journal article supplement (https://www.spandidos-publications.com/6864/downloadSupplementary)
Supplement: Supplementary file 1 [file downloadSupplementary]

## Sheet: Proteins
Table SI. The result of purified LV analyzed by high performance liquid chromatography.
Protein FDR Confidence: Combined	Accession	Description	Sum PEP Score	Coverage [%]	# Peptides	# PSMs	# Unique Peptides	# AAs	MW [kDa]	calc. pI	Score Sequest HT: Sequest HT	Gene Symbol	Biological Process	Cellular Component	Molecular Function	Abundances (Normalized): F1: Sample	Modifications
High	Q1LWN2	Vitellogenin 1 OS=Danio rerio OX=7955 GN=vg1 PE=1 SV=1	949.307	68	129	577	36	1362	149.1	8.59	1663.64	vg1	transport;developmental processes;other biological processes		transporter activity;other molecular function	6.81234e+11
High	A0A8M1N6R0	Vitellogenin 5 precursor OS=Danio rerio OX=7955 GN=vtg5 PE=1 SV=1	828.42	63	121	536	23	1358	148.8	8.66	1509.78	vtg5	transport		transporter activity;other molecular function	1.36585e+11
High	A0A8M1NAN4	Vitellogenin 4 precursor OS=Danio rerio OX=7955 GN=vtg4 PE=1 SV=1	811.164	64	120	481	24	1358	148.8	8.76	1388.59	vtg4	transport		transporter activity;other molecular function	8.46334e+10
High	A0A8M1NG90	Vitellogenin 6 precursor OS=Danio rerio OX=7955 GN=vtg6 PE=1 SV=1	797.562	63	118	497	18	1374	150.5	8.69	1403.47	vtg6	transport		transporter activity;other molecular function	13133889829
High	Q1MTC4	Vitellogenin 2 OS=Danio rerio OX=7955 GN=si:dkey-4c23.2 PE=1 SV=1	671.332	58	116	333	98	1631	179.8	8.46	958.94	si:dkey-4c23.2	transport;other biological processes		transporter activity;other molecular function	9.11479e+10
High	A3KMS4	Vitellogenin 7 precursor OS=Danio rerio OX=7955 GN=wu:fb62f05 PE=1 SV=1	587.092	58	94	339	27	1358	148.7	8.6	946.3	wu:fb62f05	transport		transporter activity;other molecular function	1.52599e+10
High	F1QQQ3	Vitellogenin 3, phosvitinless OS=Danio rerio OX=7955 GN=cb1001 PE=1 SV=3	94.84	26	30	37	30	1253	139.9	7.47	104.42	cb1001	transport;developmental processes;other biological processes		transporter activity;other molecular function	2764328940
High	Q7ZVF9	Actin, cytoplasmic 2 OS=Danio rerio OX=7955 GN=actbb PE=1 SV=2	27.078	28	10	13	10	375	41.7	5.48	30.58	actbb		plasma membrane;other membranes;cytoskeleton;nucleus;other cell component	other molecular function	910052186
High	Q7SZD3	78 kDa glucose-regulated protein OS=Danio rerio OX=7955 GN=zgc:77606 PE=1 SV=1	25.006	21	10	10	10	650	71.9	5.14	24.06	zgc:77606	protein metabolism;other metabolic processes;stress response;signal transduction;other biological processes	non-structural extracellular;other membranes;ER/Golgi;nucleus;other cell component	other molecular function	9.0471e+07
High	Q803B0	60 kDa heat shock protein, mitochondrial OS=Danio rerio OX=7955 GN=wu:fb22d10 PE=1 SV=1	15.943	15	7	7	7	575	61.2	5.72	18.01	wu:fb22d10	cell organization and biogenesis;stress response;transport;other biological processes	other membranes;mitochondrion	other molecular function	134457127
High	F1R9V3	Heat shock cognate 70 kDa protein OS=Danio rerio OX=7955 GN=si:dkey-4p15.3 PE=1 SV=1	14.183	10	6	7	3	647	71	5.47	17.51	si:dkey-4p15.3	other biological processes	plasma membrane;other membranes;cytosol;nucleus;other cell component	other molecular function	87651578
High	Q90473	Heat shock cognate 71 kDa protein OS=Danio rerio OX=7955 GN=hspa8 PE=2 SV=1	8.451	9	5	5	2	649	70.9	5.31	8.84	hspa8	protein metabolism;other metabolic processes;transport;other biological processes	plasma membrane;other membranes;cytosol;nucleus;other cytoplasmic organelle;other cell component	other molecular function	33743382
High	A0A8M6YXV1	Pregnancy zone protein OS=Danio rerio OX=7955 GN=zgc:171426 PE=1 SV=1	6.745	3	4	4	4	1466	160	7.65	9.46	zgc:171426	other biological processes	non-structural extracellular	enzyme regulator activity	1.04139e+08
High	Q6DGY8	Proteasome subunit alpha type OS=Danio rerio OX=7955 GN=zgc:92716 PE=1 SV=1	6.232	13	3	3	3	246	27.4	6.37	7.27	zgc:92716	protein metabolism;other metabolic processes	nucleus;other cell component		34572096
High	Q6PE25	Elongation factor 1-gamma OS=Danio rerio OX=7955 GN=eef1g PE=2 SV=1	5.576	8	3	3	3	442	50.4	7.3	4.53	eef1g	protein metabolism;other metabolic processes	nucleus;other cell component	nucleic acid binding activity	23296514
High	A0A8M2BH83	Alpha-mannosidase OS=Danio rerio OX=7955 GN=man2b1 PE=1 SV=1	5.438	3	2	2	2	984	111.7	6.46	5.37	man2b1	other metabolic processes		other molecular function	6654219
High	A3KP44	Peroxiredoxin-4 precursor OS=Danio rerio OX=7955 GN=zgc:162938 PE=1 SV=1	5.4	14	3	3	3	260	29.1	6.79	6.56	zgc:162938	other metabolic processes;stress response;other biological processes	cytosol;ER/Golgi	other molecular function	24259576
High	F6P3G4	26S proteasome non-ATPase regulatory subunit 11A OS=Danio rerio OX=7955 GN=psmd11a PE=2 SV=1	5.012	7	3	3	3	421	47.3	6	6.93	psmd11a	cell organization and biogenesis;protein metabolism;other metabolic processes;other biological processes	cytosol;nucleus;other cell component	other molecular function	2.20406e+07
High	Q08C80	Tubulin beta chain OS=Danio rerio OX=7955 GN=fj41e11 PE=1 SV=1	4.853	8	3	3	3	444	49.6	4.94	6.21	fj41e11	cell cycle OR cell proliferation;cell organization and biogenesis	cytoskeleton;other cell component	cytoskeletal activity;other molecular function	62172464
High	Q6DGX8	Proteasome subunit alpha type OS=Danio rerio OX=7955 GN=zgc:92726 PE=1 SV=1	4.416	13	4	4	4	262	29.2	6.68	8.05	zgc:92726	protein metabolism;other metabolic processes	nucleus;other cell component		103863612
High	A0A8M6YXX5	Cell wall protein AWA1-like OS=Danio rerio OX=7955 GN=LOC108179134 PE=4 SV=1	4.189	4	2	2	2	577	59.7	7.61	5.41	LOC108179134				22275748
High	Q5PRD0	14-3-3 protein beta/alpha-A OS=Danio rerio OX=7955 GN=ywhaba PE=2 SV=2	3.728	9	2	2	2	244	27.6	4.78	4.09	ywhaba	cell organization and biogenesis;transport;signal transduction	other cell component		9408733
High	A8KBJ5	Histone H3 OS=Danio rerio OX=7955 GN=si:ch211-113a14.27 PE=1 SV=1	3.495	15	2	2	2	136	15.4	11.27	4.92	si:ch211-113a14.27		nucleus;other cell component	nucleic acid binding activity;other molecular function	36327870
High	Q7ZUW2	Hypoxia up-regulated protein 1 OS=Danio rerio OX=7955 GN=hyou1 PE=2 SV=1	3.392	2	2	2	2	980	110.3	5.07	4.92	hyou1	stress response;transport;other biological processes	ER/Golgi	other molecular function	8469533
High	Q6NWF6	Keratin, type II cytoskeletal 8 OS=Danio rerio OX=7955 GN=krt8 PE=1 SV=1	3.382	4	2	2	2	520	57.7	5.22	4.8	krt8	other biological processes	cytoskeleton;nucleus;other cell component	bone, tooth or skin structural activity	32870772
High	B0S6C5	Inactive all-trans-retinol 13,14-reductase OS=Danio rerio OX=7955 GN=retsatl PE=1 SV=1	3.218	4	2	2	2	604	67.9	7.77	4.75	retsatl			other molecular function	6065012
High	F1QNE0	Nuclear autoantigenic sperm protein OS=Danio rerio OX=7955 GN=wu:fd20g12 PE=1 SV=1	3.158	3	2	2	2	622	68	4.45	2.94	wu:fd20g12	cell organization and biogenesis	nucleus	other molecular function	92346562
High	Q6TGV6	Proteasome subunit alpha type OS=Danio rerio OX=7955 GN=PSMA5 PE=1 SV=1	3.083	8	1	1	1	241	26.4	4.82	2.96	PSMA5	protein metabolism;other metabolic processes	nucleus;other cell component
High	A0A8M2BBI5	Glucosidase 2 subunit beta OS=Danio rerio OX=7955 GN=prkcsh PE=1 SV=1	2.881	3	2	2	2	572	64.5	4.74	4.61	prkcsh		other membranes	other molecular function	8041251
High	O57521	Heat shock protein HSP 90-beta OS=Danio rerio OX=7955 GN=hsp90ab1 PE=1 SV=2	2.841	3	2	2	2	725	83.3	5	4.02	hsp90ab1	stress response;developmental processes;other biological processes	non-structural extracellular;plasma membrane;other membranes;cytosol;nucleus;other cell component	other molecular function	2.72362e+07
High	F1Q6Z9	Glucosidase, alpha; neutral AB OS=Danio rerio OX=7955 GN=ganab PE=1 SV=3	2.813	2	2	2	2	941	106.8	5.54	4.08	ganab	protein metabolism;other metabolic processes	ER/Golgi	other molecular function	14820971
High	Q4V918	Proteasome subunit alpha type OS=Danio rerio OX=7955 GN=zgc:114044 PE=1 SV=1	2.802	5	1	1	1	255	28.4	5.06	3.17	zgc:114044	protein metabolism;other metabolic processes	nucleus;other cell component		14712672
High	Q7T3L3	Chaperone protein GP96 OS=Danio rerio OX=7955 GN=GP96 PE=1 SV=1	2.533	2	1	1	1	793	91.2	4.86	2.01	GP96	protein metabolism;other metabolic processes;stress response;other biological processes		other molecular function	15617455
High	A0A8M9QH30	Actinin, alpha 4 OS=Danio rerio OX=7955 GN=wu:fb53f05 PE=1 SV=1	2.507	1	1	1	1	923	106.1	5.17	3.25	wu:fb53f05			cytoskeletal activity;other molecular function	8850551
High	A0A8M2BIL6	Tyrosine-protein kinase receptor OS=Danio rerio OX=7955 GN=insra PE=1 SV=1	2.498	1	1	2	1	1362	154.1	6.74	0	insra	protein metabolism;other metabolic processes;signal transduction	plasma membrane;other membranes	kinase activity;other molecular function	9922912
High	A0A8M1P748	UTP--glucose-1-phosphate uridylyltransferase OS=Danio rerio OX=7955 GN=ugp2b PE=1 SV=1	2.393	4	2	2	2	554	61.8	8.94	4.4	ugp2b	other metabolic processes		other molecular function	12019643
High	Q802C9	ATP-dependent RNA helicase OS=Danio rerio OX=7955 GN=eif4a1 PE=1 SV=1	2.389	2	1	1	1	406	46.2	5.41	1.97	eif4a1	protein metabolism;other metabolic processes		nucleic acid binding activity;other molecular function
High	A0A8M9PT53	Filamin-A isoform X1 OS=Danio rerio OX=7955 GN=flna PE=1 SV=1	2.381	0	1	1	1	2552	272.3	5.76	2.69	flna	cell organization and biogenesis	other cell component	cytoskeletal activity	8631678
High	Q7ZWE5	26S proteasome non-ATPase regulatory subunit 6 OS=Danio rerio OX=7955 GN=zgc:56471 PE=1 SV=1	2.365	4	1	1	1	386	45.3	6.73	2.57	zgc:56471	protein metabolism;other metabolic processes;developmental processes	other cell component
High	Q6TH48	Aldehyde dehydrogenase 2 family member, tandem duplicate 2 OS=Danio rerio OX=7955 GN=ALDH2 PE=1 SV=1	2.321	5	2	2	2	516	56.5	6.47	4.6	ALDH2	other biological processes		other molecular function	102823072
High	Q6P0I2	Proteasome subunit alpha type OS=Danio rerio OX=7955 GN=zgc:77139 PE=1 SV=1	2.23	4	1	1	1	251	28.1	8.84	2.29	zgc:77139	protein metabolism;other metabolic processes	nucleus;other cell component		24748366
High	Q9W792	T-complex protein 1 subunit alpha OS=Danio rerio OX=7955 GN=fa13h08 PE=1 SV=1	1.963	3	1	1	1	556	59.9	6.28	2.67	fa13h08	other biological processes	cytosol	other molecular function
High	A2CG95	Medium-chain specific acyl-CoA dehydrogenase, mitochondrial OS=Danio rerio OX=7955 GN=MCAD PE=1 SV=1	1.93	3	1	1	1	426	46.3	8.05	2.8	MCAD	other metabolic processes	mitochondrion;other cell component	other molecular function	7054283
High	B3DG31	Proteasome subunit alpha type OS=Danio rerio OX=7955 GN=si:rp71-45k5.4 PE=2 SV=1	1.598	7	1	1	1	234	25.9	6.35	2.43	si:rp71-45k5.4	protein metabolism;other metabolic processes	nucleus;other cell component
High	Q803Q1	Glycogenin 1 OS=Danio rerio OX=7955 GN=gyg1 PE=1 SV=1	1.554	2	1	1	1	329	37	5.74	2.05	gyg1		other cell component	other molecular function	12494214
High	A0A8M9Q4F0	Alpha-1-antiproteinase 2-like OS=Danio rerio OX=7955 GN=LOC110439158 PE=3 SV=1	1.549	2	1	1	1	412	47.2	5.72	2.06	LOC110439158		non-structural extracellular	enzyme regulator activity
High	X1WHF1	Histone H2B OS=Danio rerio OX=7955 GN=si:dkey-261m9.6 PE=3 SV=1	1.544	7	1	1	1	124	13.6	10.37	1.74			nucleus;other cell component	nucleic acid binding activity;other molecular function	16157659
High	A0A0R4IJT8	T-complex protein 1 subunit theta OS=Danio rerio OX=7955 GN=fa22h09 PE=1 SV=1	1.525	2	1	1	1	558	60.7	5.47	2.28	fa22h09	other biological processes	cytosol	other molecular function	6116709
High	Q6YBS2	Adenylyl cyclase-associated protein OS=Danio rerio OX=7955 GN=fj98f01 PE=1 SV=1	1.498	2	1	1	1	463	49.4	8.34	1.91	fj98f01	cell organization and biogenesis;developmental processes;signal transduction;other biological processes	plasma membrane;other membranes;other cell component	cytoskeletal activity;other molecular function
High	Q5XJ12	Stress-70 protein, mitochondrial OS=Danio rerio OX=7955 GN=wu:fc27c10 PE=1 SV=1	1.372	1	1	1	1	682	73.9	7.14	0	wu:fc27c10	other biological processes	mitochondrion;other cell component	other molecular function	15591237
High	Q9DDE2	Nothepsin OS=Danio rerio OX=7955 GN=aspartic proteinase PE=1 SV=1	1.359	2	1	1	1	416	46.1	6.54	1.85	aspartic proteinase	protein metabolism		other molecular function
High	Q6PH46	T-complex protein 1 subunit delta OS=Danio rerio OX=7955 GN=zgc:65789 PE=1 SV=1	1.338	2	1	1	1	533	56.9	6.8	2.15	zgc:65789	stress response;other biological processes	cytosol	other molecular function
High	A8WGC6	ATP synthase subunit beta OS=Danio rerio OX=7955 GN=atp5b PE=1 SV=1	1.26	3	1	1	1	517	55.1	5.27	2.4	atp5b	other metabolic processes;transport	other membranes;mitochondrion	transporter activity;other molecular function	9623054
High	Q7ZV77	Proteasome subunit alpha type OS=Danio rerio OX=7955 GN=wu:fe05d10 PE=1 SV=1	1.22	3	1	1	1	261	29.3	7.71	2.01	wu:fe05d10	protein metabolism;other metabolic processes	cytosol;nucleus;other cell component		23669412
High	Q7SY46	H(+)-transporting two-sector ATPase OS=Danio rerio OX=7955 GN=atp6v1al PE=1 SV=1	1.218	1	1	1	1	617	68.3	5.66	2.1	atp6v1al	other metabolic processes;transport;other biological processes	plasma membrane;other membranes	transporter activity;other molecular function	6.53602e+06
Medium	A0A0R4IGP6	Pyruvate kinase OS=Danio rerio OX=7955 GN=cb1029 PE=1 SV=1	1.212	2	1	1	1	532	58.1	6.48	2.05	cb1029	other metabolic processes;developmental processes	other cell component	kinase activity;other molecular function	21245296
Medium	F1QG18	D(3) dopamine receptor isoform X1 OS=Danio rerio OX=7955 GN=drd3 PE=3 SV=1	1.159	8	1	1	1	472	52.9	8.72	0		cell-cell signaling;signal transduction;other biological processes	plasma membrane;other membranes;other cell component	other molecular function
Medium	Q9PTP1	Proliferating cell nuclear antigen OS=Danio rerio OX=7955 GN=pcna PE=1 SV=2	1.131	3	1	1	1	260	28.6	4.67	0	pcna	DNA metabolism;other metabolic processes;stress response;other biological processes	nucleus	enzyme regulator activity;nucleic acid binding activity
Medium	A0A8M3BD81	Zinc finger CCHC domain-containing protein 12-like OS=Danio rerio OX=7955 GN=LOC103911763 PE=4 SV=1	1.035	3	1	1	1	622	70	7.4	0	LOC103911763			nucleic acid binding activity;other molecular function	821880000
Medium	Q7ZUN6	Multifunctional protein ADE2 OS=Danio rerio OX=7955 GN=cb293 PE=1 SV=1	1.028	2	1	1	1	425	47	7.3	1.95	cb293	other metabolic processes;developmental processes;other biological processes		other molecular function
Medium	A0A8M6Z208	Maestro heat-like repeat family member 1 OS=Danio rerio OX=7955 GN=mroh1 PE=4 SV=1	0.987	1	1	1	1	1651	184.9	6.71	2.07			other cell component		59401896
Medium	A0A8M1NS15	Elongation factor 1-alpha OS=Danio rerio OX=7955 GN=si:dkey-37o8.1 PE=1 SV=1	0.983	2	1	1	1	458	50.6	9.74	2.38	si:dkey-37o8.1	protein metabolism;other metabolic processes	other cell component	nucleic acid binding activity;other molecular function	11029278
Medium	A0A8M9Q4R3	Uncharacterized protein si:dkey-90l23.1 OS=Danio rerio OX=7955 GN=si:dkey-90l23.1 PE=1 SV=1	0.96	2	1	1	1	489	54.3	8.05	0	si:dkey-90l23.1			other molecular function	14235585
Medium	Q08BA1	ATP synthase subunit alpha OS=Danio rerio OX=7955 GN=atp5a1 PE=1 SV=1	0.938	2	1	1	1	551	59.7	9.03	0	atp5a1	other metabolic processes;stress response;transport	other membranes;mitochondrion	transporter activity;other molecular function
Medium	A0A8M9PBH8	Sterile alpha motif domain-containing protein 9-like OS=Danio rerio OX=7955 GN=LOC101882642 PE=4 SV=1	0.928	2	1	2	1	1483	169.9	6.65	0	LOC101882642				35996748
Medium	A0A8N7TFH6	E3 ubiquitin-protein ligase hyd-like OS=Danio rerio OX=7955 GN=LOC570835 PE=4 SV=1	0.919	11	1	1	1	222	24.3	4.4	0	LOC570835			nucleic acid binding activity
Medium	Q90476	LIM/homeobox protein Lhx1 OS=Danio rerio OX=7955 GN=lhx1a PE=2 SV=1	0.906	2	1	1	1	405	45.1	7.56	0	lhx1a	cell-cell signaling;cell organization and biogenesis;RNA metabolism OR transcription;other metabolic processes;developmental processes;other biological processes	nucleus;other cell component	nucleic acid binding activity;other molecular function
Medium	A5PMV7	Protein phosphatase 2, regulatory subunit A, beta a OS=Danio rerio OX=7955 GN=ppp2r1a PE=1 SV=1	0.902	3	1	1	1	589	65.4	5.02	0	ppp2r1a	protein metabolism;other metabolic processes	other cell component	enzyme regulator activity	164412592
Medium	F1DB26	ABC-type glutathione-S-conjugate transporter OS=Danio rerio OX=7955 GN=zgc:66072 PE=1 SV=1	0.901	2	1	1	1	1567	175.5	7.39	0	zgc:66072	transport	plasma membrane;other membranes	transporter activity;other molecular function	24900348
																1.0281e+12
